# Supplementary material for: Formation and evolution of C–C, C–O, CO and C–N bonds in chemical reactions of prebiotic interest
Source: Royal Society of Chemistry journal article supplement (doi:10.1039/d2ra06000k), 2022-01-01
Supplement: d2ra06000k2.pdf [file d2ra06000k2.pdf]

# Formation and evolution of C–C, C–O, C=O and C–N bonds in chemical reactions of prebiotic interest

Alejandro Arias,<sup>†</sup> Sara Gómez,<sup>‡</sup> Natalia Rojas-Valencia,<sup>†,¶</sup> Francisco Núñez-Zarur,<sup>§</sup>  
Chiara Cappelli,<sup>‡</sup> Juliana A. Murillo-López,<sup>||</sup> Albeiro Restrepo<sup>†</sup>

<sup>†</sup>*Instituto de Química, Universidad de Antioquia UdeA, Calle 70 No. 52-21, Medellín, Colombia*

<sup>‡</sup>*Scuola Normale Superiore, Classe di Scienze, Piazza dei Cavalieri 7, 56126, Pisa, Italy*

<sup>¶</sup>*Escuela de Ciencias y Humanidades, Departamento de Ciencias Básicas, Universidad Eafit, AA 3300, Medellín, Colombia*

<sup>§</sup>*Facultad de Ciencias Básicas, Universidad de Medellín, Carrera 87 No. 30-65, 050026, Medellín, Colombia*

<sup>||</sup>*Departamento de Ciencias Químicas, Facultad de Ciencias Exactas, Universidad Andres Bello, Autopista, Concepción-Talcahuano, 7100 Talcahuano, Chile*

## Supplementary Material

Table S1: Intrinsic activation and reaction energies for our 23 elementary steps at 373 K and 1atm, in kcal/mol units. An asterisk attached to a label means that HNC is involved instead of HCN. Notice that reaction **14** leads to different products than those reported by Das and coworkers[1] in gas phase.

| Label      | Reaction                                                                                                           | $\Delta G_{\text{act}}^{\ddagger}$ |             | $\Delta G_{\text{rxn}}$ |             |
|------------|--------------------------------------------------------------------------------------------------------------------|------------------------------------|-------------|-------------------------|-------------|
|            |                                                                                                                    | In gas phase                       | In solution | In gas phase            | In solution |
| <b>1</b>   | $\text{HCN} + \text{H}_2\text{O} \rightarrow \text{CH}_3\text{NO}$                                                 | 50.5                               | 52.5        | 13.7                    | 12.1        |
| <b>2</b>   | $\text{CH}_3\text{NO} \rightarrow \text{CH}_3\text{NO}$                                                            | 10.8                               | 10.2        | -10.9                   | -13.2       |
| <b>3</b>   | $\text{CH}_3\text{NO} + \text{H}_2\text{O} \rightarrow \text{NH}_3 + \text{CH}_2\text{O}_2$                        | 47.1                               | 47.5        | 5.5                     | 10.2        |
| <b>4*</b>  | $\text{CH}_2\text{O}_2 + \text{HCN} \rightarrow \text{C}_2\text{HNO} + \text{H}_2\text{O}$                         | 59.7                               | 63.8        | 26.1                    | 25.4        |
| <b>5*</b>  | $\text{C}_2\text{HNO} \rightarrow \text{CO} + \text{HCN}$                                                          | 31.1                               | 21.3        | -31.7                   | -31.4       |
| <b>6</b>   | $\text{CO} + \text{H}_2\text{O} \rightarrow \text{CH}_2\text{O}_2$                                                 | 64.9                               | 64.9        | 47.7                    | 47.0        |
| <b>7</b>   | $\text{HCN} \rightarrow \text{HNC}$                                                                                | 54.8                               | 43.2        | 16.2                    | 15.0        |
| <b>8</b>   | $\text{CH}_2\text{O}_2 \rightarrow \text{CO}_2 + \text{H}_2$                                                       | 51.3                               | 50.1        | -12.7                   | -6.8        |
| <b>9</b>   | $\text{CH}_2\text{O}_2 + \text{H}_2 \rightarrow \text{CH}_4\text{O}_2$                                             | 53.2                               | 56.5        | -3.6                    | 5.8         |
| <b>10</b>  | $\text{CH}_4\text{O}_2 \rightarrow \text{CH}_2\text{O} + \text{H}_2\text{O}$                                       | 31.7                               | 30.0        | -0.2                    | -4.1        |
| <b>11*</b> | $\text{CH}_2\text{O} + \text{HNC} \rightarrow \text{C}_2\text{H}_3\text{NO}$                                       | 26.6                               | 22.9        | -24.0                   | -24.6       |
| <b>12</b>  | $\text{CH}_2\text{O} + \text{NH}_3 \rightarrow \text{CH}_5\text{NO}$                                               | 39.2                               | 31.7        | -1.0                    | -0.8        |
| <b>13</b>  | $\text{CH}_5\text{NO} \rightarrow \text{CH}_3\text{N} + \text{H}_2\text{O}$                                        | 36.4                               | 34.4        | 0.1                     | -0.6        |
| <b>14*</b> | $\text{CH}_3\text{N} + \text{HCN} \rightarrow \text{C}_2\text{H}_4\text{N}_2$                                      | NA                                 | 5.5         | NA                      | -29.6       |
| <b>14</b>  | $\text{CH}_3\text{N} + \text{HCN} \rightarrow \text{C}_2\text{H}_4\text{N}_2$                                      | 36.6                               | NA          | 8.9                     | NA          |
| <b>15</b>  | $\text{C}_2\text{H}_4\text{N}_2 + \text{H}_2\text{O} \rightarrow \text{C}_2\text{H}_6\text{N}_2\text{O}$           | 50.3                               | 50.5        | 13.6                    | 12.6        |
| <b>16</b>  | $\text{C}_2\text{H}_6\text{N}_2\text{O} \rightarrow \text{C}_2\text{H}_6\text{N}_2\text{O}$                        | 9.8                                | 8.9         | -11.3                   | -13.7       |
| <b>17</b>  | $\text{C}_2\text{H}_6\text{N}_2\text{O} + \text{H}_2\text{O} \rightarrow \text{C}_2\text{H}_5\text{NO}_2$          | 47.3                               | 46.1        | 1.9                     | 6.0         |
| <b>18</b>  | $\text{C}_2\text{H}_3\text{NO} + \text{CH}_2\text{O} \rightarrow \text{C}_3\text{H}_5\text{NO}_2$                  | 50.0                               | 43.7        | -12.9                   | -14.3       |
| <b>19*</b> | $\text{C}_3\text{H}_5\text{NO}_2 \rightarrow \text{C}_2\text{H}_4\text{O}_2 + \text{HCN}$                          | 37.8                               | 29.2        | 21.6                    | 17.3        |
| <b>20</b>  | $\text{C}_2\text{H}_3\text{NO} + \text{CH}_3\text{NO} \rightarrow \text{C}_3\text{H}_6\text{N}_2\text{O}_2$        | 35.5                               | 36.4        | 17.8                    | 19.3        |
| <b>21</b>  | $\text{C}_3\text{H}_6\text{N}_2\text{O}_2 + \text{HCN} \rightarrow \text{C}_4\text{H}_7\text{N}_3\text{O}_2$       | 50.2                               | 56.8        | 11.5                    | 13.2        |
| <b>22</b>  | $\text{C}_4\text{H}_7\text{N}_3\text{O}_2 \rightarrow \text{C}_4\text{H}_7\text{N}_3\text{O}_2$                    | 48.9                               | 38.7        | -7.5                    | -8.5        |
| <b>23</b>  | $\text{C}_4\text{H}_7\text{N}_3\text{O}_2 \rightarrow \text{C}_4\text{H}_5\text{N}_3\text{O} + \text{H}_2\text{O}$ | 31.9                               | 30.4        | -6.2                    | -6.2        |

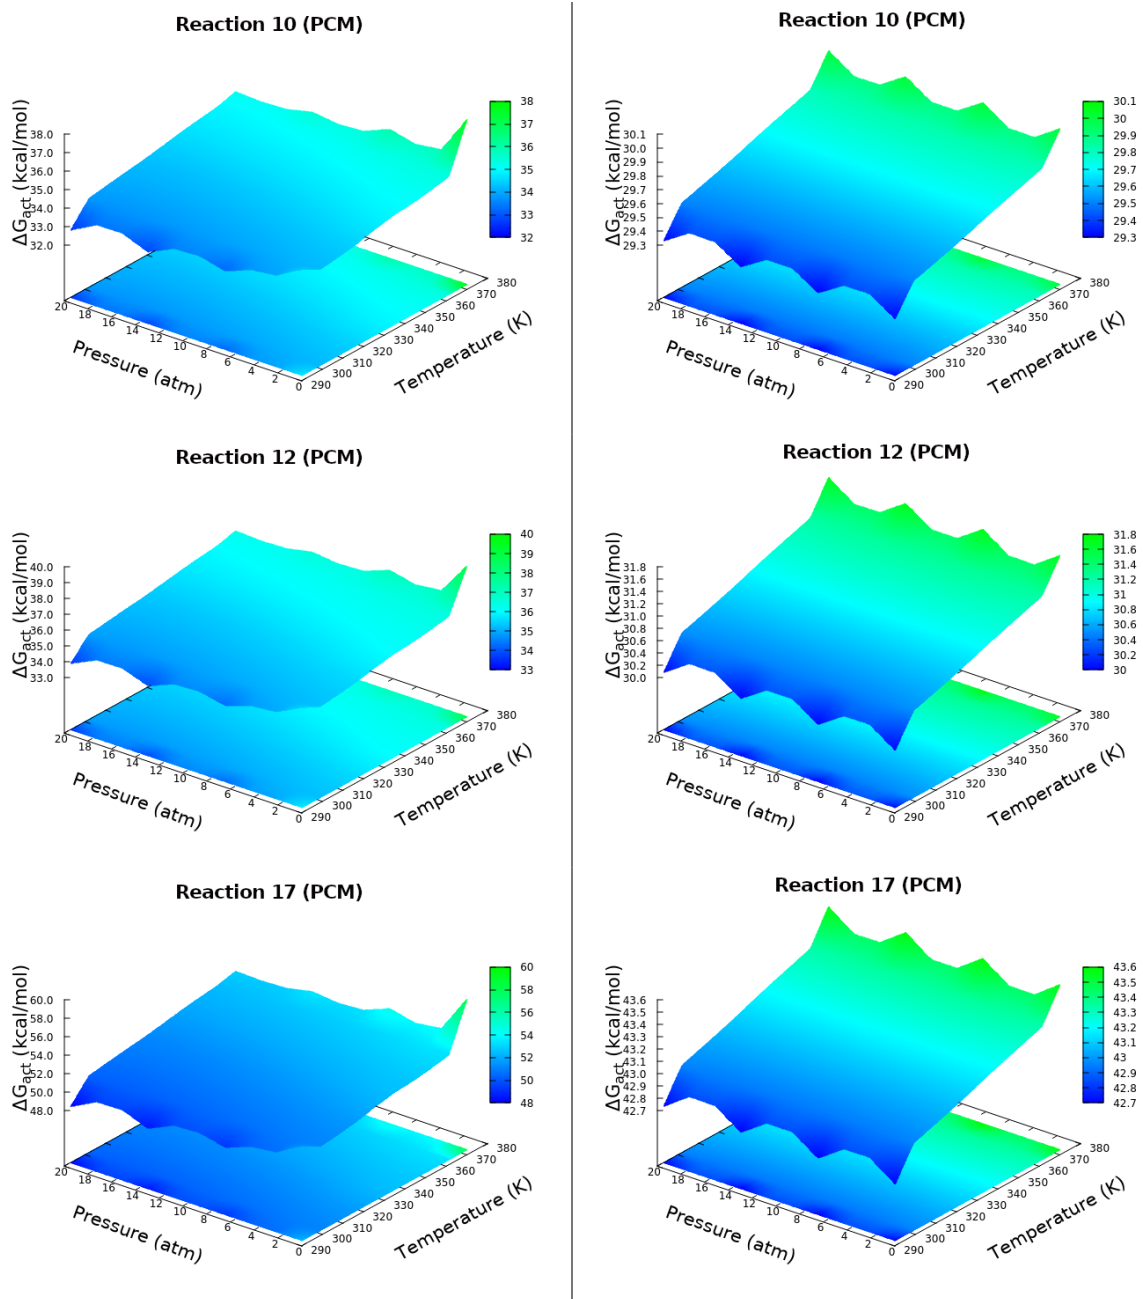

Figure S1: Absolute (left) and intrinsic (right) activation energies for elementary steps **10**, **12** and **17** (Table 1), in *solution*, over a grid of temperatures in [293, 373] K and pressures in [0.5, 20] atm.

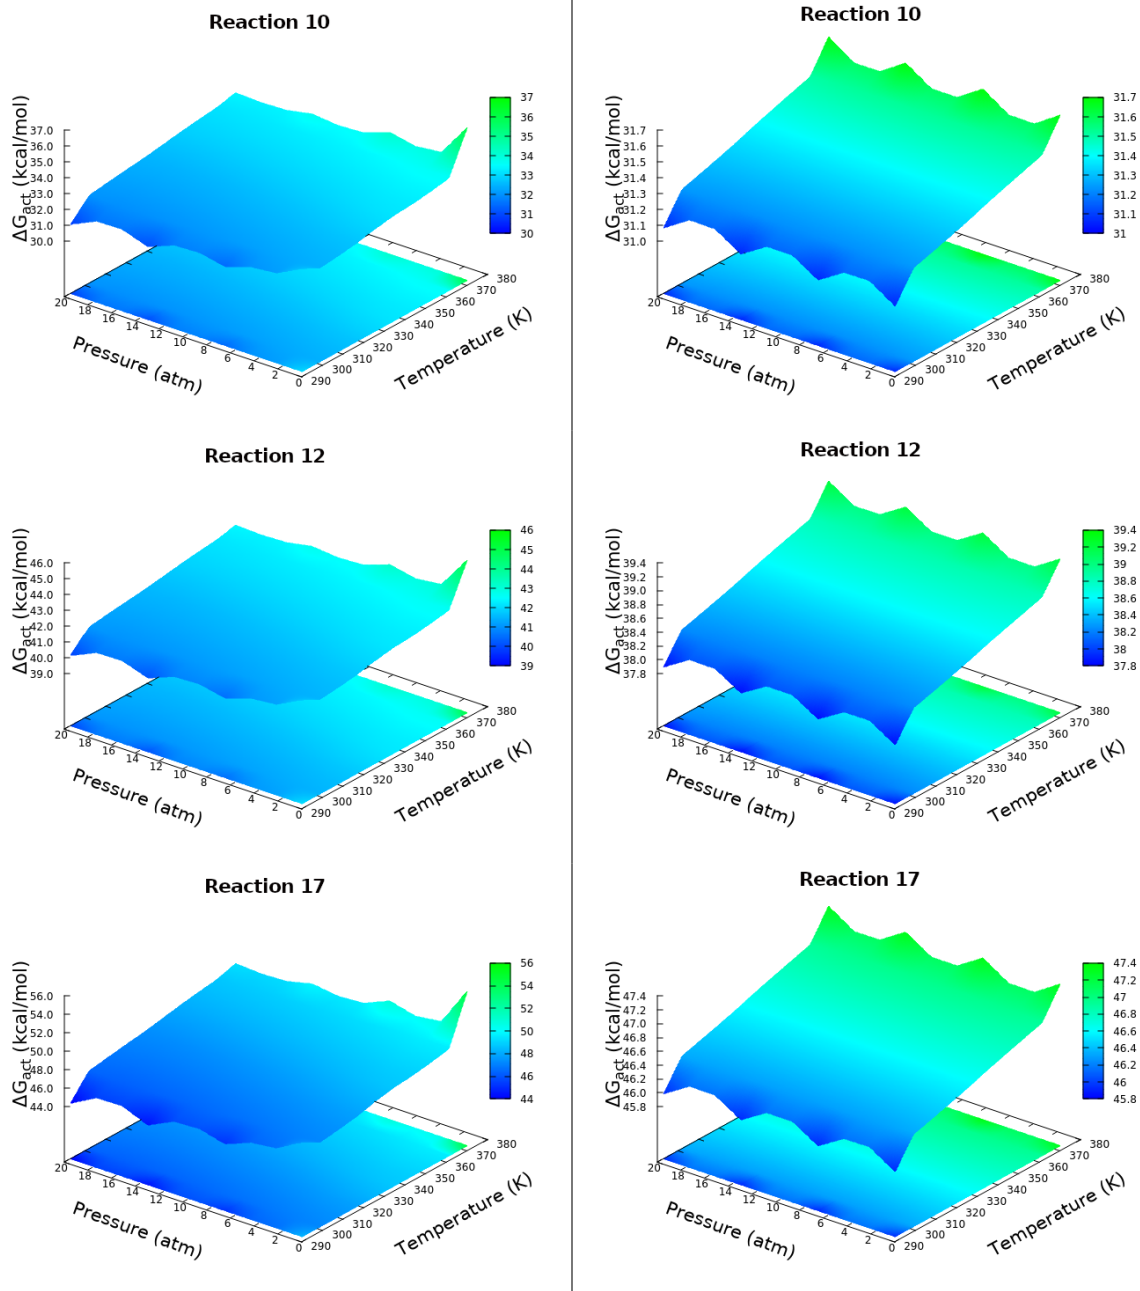

Figure S2: Absolute (left) and intrinsic (right) activation energies for elementary steps **10**, **12** and **17** (Table 1), in *vacuo*, over a grid of temperatures in [293, 373] K and pressures in [0.5, 20] atm.

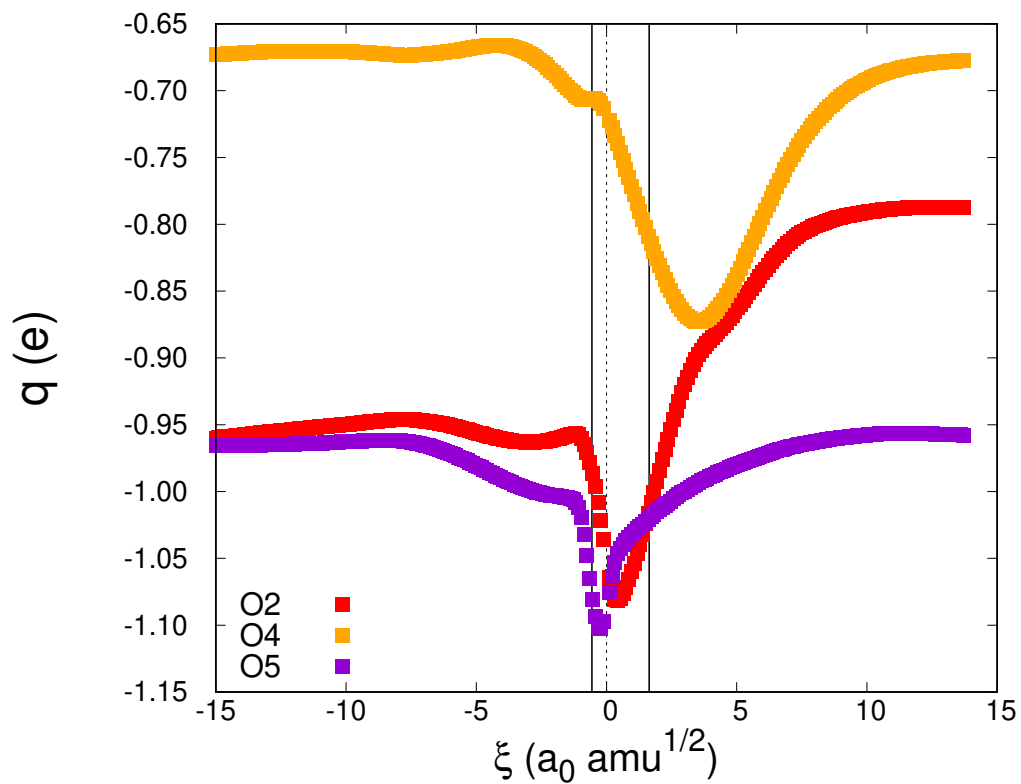

Figure S3: Natural charges at oxygen atoms along the IRC for the reaction **3**.

## References

- [1] Tamal Das, Siddharth Ghule, and Kumar Vanka. Insights into the origin of life: Did it begin from hcn and h<sub>2</sub>o? *ACS central science*, 5(9):1532–1540, 2019.
